# Supplementary material
Source: PubMed Central journal article supplement (PMC10245623)
Supplement: 12889_2023_15939_MOESM1_ESM.pdf [file 12889_2023_15939_MOESM1_ESM.pdf]

## ICPC-2, ICD-10 and ATC codes used to identify comorbidities

| ICPC-2 codes, ICD-10 codes and ATC codes used for comorbidities |                                                       |                                  |
|-----------------------------------------------------------------|-------------------------------------------------------|----------------------------------|
| High-risk persons                                               | HIV AIDS (ICPC-2 B90)                                 | Ever diagnosed before 31/12/YEAR |
|                                                                 | Lymphoma (ICPC-2 B72)                                 | Ever diagnosed before 31/12/YEAR |
|                                                                 | Leukaemia (ICPC-2 B73)                                | Ever diagnosed before 31/12/YEAR |
|                                                                 | Malignant neoplasm (ICPC-2 B74)                       | Ever diagnosed before 31/12/YEAR |
|                                                                 | Asplenia (ICD-10 D73.0)                               | Ever diagnosed before 31/12/YEAR |
|                                                                 | Sickle-cell disease (ICPC-2 B78)                      | Ever diagnosed before 31/12/YEAR |
|                                                                 | Cerebrospinal fluid leak (ICD-10 G96.0)               | 01/01/YEAR – 31/12/YEAR          |
|                                                                 | Cochlear implant (ICD-10 Z96.2)                       | Ever diagnosed before 31/12/YEAR |
|                                                                 | Immunosuppressants (ATC L04)                          | in YEAR or YEAR-1                |
|                                                                 | Glucocorticoids (ATC H02AB)                           | at least 2x in YEAR              |
| Medium-risk persons                                             | Chronic bronchitis (ICPC-2 R79)                       | Ever diagnosed before 31/12/YEAR |
|                                                                 | Congenital respiratory anomaly (ICPC-2 R89)           | Ever diagnosed before 31/12/YEAR |
|                                                                 | COPD (ICPC-2 R95)                                     | Ever diagnosed before 31/12/YEAR |
|                                                                 | Asthma (ICPC-2 R96)                                   | Ever diagnosed before 31/12/YEAR |
|                                                                 | Congenital cardiovascular anomaly (ICPC-2 K73)        | Ever diagnosed before 31/12/YEAR |
|                                                                 | Angina pectoris (ICPC-2 K74)                          | Ever diagnosed before 31/12/YEAR |
|                                                                 | Acute myocardial infarction (ICPC-2 K75)              | Ever diagnosed before 31/12/YEAR |
|                                                                 | Chronic ischaemic heart disease (ICPC-2 K76)          | Ever diagnosed before 31/12/YEAR |
|                                                                 | Heart failure (ICPC-2 K77)                            | Ever diagnosed before 31/12/YEAR |
|                                                                 | Atrial fibrillation (ICPC-2 K78)                      | Ever diagnosed before 31/12/YEAR |
|                                                                 | Pulmonary heart disease (ICPC-2 K82)                  | Ever diagnosed before 31/12/YEAR |
|                                                                 | Heart valve disease (ICPC-2 K83)                      | Ever diagnosed before 31/12/YEAR |
|                                                                 | TIA (ICPC-2 K89)                                      | Ever diagnosed before 31/12/YEAR |
|                                                                 | CVA (ICPC-2 K90)                                      | Ever diagnosed before 31/12/YEAR |
|                                                                 | Peripheral arterial disease (ICPC-2 K92)              | Ever diagnosed before 31/12/YEAR |
|                                                                 | Chronic liver disease (ICPC-2 D97)                    | Ever diagnosed before 31/12/YEAR |
|                                                                 | Chronic alcohol abuse (ICPC-2 P15)                    | Ever diagnosed before 31/12/YEAR |
|                                                                 | Chronic kidney disease eGFR < 60 mL/min               | 1x <60 in YEAR-2 or YEAR-2       |
|                                                                 | Diabetes mellitus (ICPC-2 T89 or T90)*                | Ever diagnosed before 31/12/YEAR |
|                                                                 | Multiple sclerosis (ICPC-2 N86)*                      | Ever diagnosed before 31/12/YEAR |
|                                                                 | Parkinson's disease (ICPC-2 N87)*                     | Ever diagnosed before 31/12/YEAR |
|                                                                 | Muscular dystrophy (ICD-10 G71.0)*                    | Ever diagnosed before 31/12/YEAR |
|                                                                 | Myasthenia gravis (ICD-10 G70.0)*                     | Ever diagnosed before 31/12/YEAR |
| Lambert-Eaton syndrome (ICD-10 G73.1)*                          | Ever diagnosed before 31/12/YEAR                      |                                  |
| Myopathy (ICD-10 G70, G71, G72, G73)*                           | Ever diagnosed before 31/12/YEAR                      |                                  |
| Motor neuron disease (ICD-10 G12.2)*                            | Ever diagnosed before 31/12/YEAR                      |                                  |
| Charcot-Marie-Tooth disease (ICD-10 G60.0)*                     | Ever diagnosed before 31/12/YEAR                      |                                  |
| Low-risk persons                                                | All other persons in the yearly contact group of YEAR |                                  |

\*: comorbidities included in 2020 recommendations

YEAR: the year for which the disease profile is constructed
